# Supplementary material
Source: PubMed Central journal article supplement (PMC10628846)
Supplement: jamaneurol-e234038-s001.pdf [file jamaneurol-e234038-s001.pdf]

## Supplemental Online Content

Steward A, Biel D, Dewenter A, et al. ApoE4 and connectivity-mediated spreading of tau pathology at lower amyloid levels. *JAMA Neurol*. Published online November 6, 2023. doi:10.1001/jamaneurol.2023.4038

### eAppendix

**eTable 1.** Demographics and Clinical data stratified by ApoE carriage

**eTable 2.** Regression model ANOVA & Akaike information criterion

**eTable 3.** Mediation Results controlled for clinical diagnosis

**eTable 4.** Interaction effects estimated by linear regression controlled for clinical diagnosis

**eTable 5.** Demographic and Clinical data for dementia subjects stratified by ApoE4 carriage

**eTable 6.** Interaction effects estimated by linear regression in CN, MCI & Dementia subjects

**eTable 7.** Effect of Annual tau-SUVr change on MMSE change

**eFigure 1.** Group-average tau-PET SUVr in ADNI at baseline

**eFigure 2.** Required sample sizes to detect simulated intervention effects with tau change as an endpoint

**eFigure 3.** Scatterplots illustrating the interaction effect between ApoE4 status and centiloid on the annual rate of tau SUVr change in CN, MCI & Dementia subjects

This supplemental material has been provided by the authors to give readers additional information about their work.

## 1. eAppendix

### 1. *MRI and PET Acquisition*

For ADNI, structural MRI was acquired on 3T Siemens (SIEMENS Healthineers, Erlangen, Germany) and 3T GE scanners. T1-weighted structural scans were collected using an MPRAGE sequence (TR=2300ms; Voxel size=1x1x1mm; for parameter details see: <https://adni.loni.usc.edu/wp-content/uploads/2017/07/ADNI3-MRI-protocols.pdf>). PET data was assessed post intravenous injection of  $^{18}\text{F}$ -labeled tracers (Flortaucipir: 6x5min time-frames, 75-105min post-injection; Florbetapir: 4x5min time-frames, 50-70min post-injection; Florbetaben: 4x5min time-frames, 90-110min post-injection; for more information see <http://adni.loni.usc.edu/methods/pet-analysis-method/pet-analysis/>).

In A05, PET data was assessed post intravenous injection of  $^{18}\text{F}$ -labeled tracers ( $^{18}\text{F}$ -flortaucipir: 4x5min time-frames, approx. 80min post-injection;  $^{18}\text{F}$ -florbetapir: 2x5min time-frames, approx. 50min post-injection)

### 2. *PET preprocessing*

For ADNI, dynamically acquired tau-PET images were realigned and averaged to obtain single Flortaucipir images. Using brain extracted T1-weighted images and ANTs-derived non-linear spatial normalization parameters<sup>68</sup>, tau-PET images were affine registered to T1-weighted images, spatially normalized to MNI space and intensity normalized using an inferior cerebellar grey reference<sup>69</sup>. For A05, Tau-PET images were preprocessed by Avid investigators. Specifically, native-space tau-PET images were rigidly co-registered to T1-weighted structural MRI and spatially normalized to MNI standard MNI space using FSL ‘fnirt’ (<https://fsl.fmrib.ox.ac.uk/fsl/fslwiki/FNIRT>). SUVRs were obtained by intensity normalization to the inferior cerebellum.

All tau-PET images were then parcelled into 200 Schaefer atlas cortical regions of interest (ROIs) by averaging voxels falling within a given ROI<sup>38</sup>. We specifically chose this atlas because of its

exclusion of areas susceptible to Flortaucipir tracer off-target binding<sup>70,71</sup>. The atlas was masked using a group-specific grey matter mask binarized at 0.3 probability.

### 3. *Resting-state fMRI acquisition and preprocessing*

rs-fMRI was obtained using a 3D echo-planar imaging (EPI) sequence with a total of 200 fMRI volumes per subject (TR=3000ms; TE=30ms; flip angle=90°; Voxel size=3.4mm isotropic).

To determine a connectivity template for modelling connectivity-based tau spreading, ten minutes of 3T resting-state fMRI data recorded on Siemens scanners (TR=3s) of 42 CN subjects (age: 72±7.24 years; 26 females) without evidence of AD pathology (i.e. global <sup>18</sup>F-Florbetapir SUVR<1.11) were included. The images were slice-time and motion corrected and co-registered to native T1-weighted images. To denoise EPI images, we regressed out nuisance covariates of eroded white matter and cerebrospinal fluid segments plus six motion parameters and their time and dispersion derivatives, followed by detrending and band-pass filtering (0.01-0.08Hz). To further reduce movement artifacts which may compromise connectivity assessment<sup>72</sup> we performed motion scrubbing, removing volumes exceeding a 0.3mm frame-wise displacement threshold, plus one prior and two subsequent volumes. Pre-processed fMRI images were subsequently normalized to MNI space using ANTs.

## 2. SUPPLEMENTAL TABLES

**eTable 1.** Demographic and Clinical data stratified by ApoE carriage

|                                                | $\epsilon 4-$                        | $\epsilon 4+$                        | p-value |
|------------------------------------------------|--------------------------------------|--------------------------------------|---------|
| <b>ADNI</b>                                    |                                      |                                      |         |
| <i>N</i>                                       | 130                                  | 107                                  |         |
| Sex (F/M)                                      | 64/66                                | 61/46                                | 0.29    |
| Age                                            | 74.8 (7.03)                          | 72.8 (7.61)                          | 0.04    |
| Clinical Diagnosis (CN/MCI)                    | 87/43                                | 65/42                                | 0.39    |
| A $\beta$ Positivity (-/+)                     | 90 <sup>b,c</sup> /40 <sup>a,d</sup> | 37 <sup>a,d</sup> /70 <sup>b,c</sup> | <0.001  |
| Education (years)                              | 16.6 (2.52)                          | 16.3 (2.44)                          | 0.37    |
| Mean tau-PET follow-up (years)                 | 2.07 (1.09)                          | 1.78 (0.738)                         | 0.02    |
| Mean BL A $\beta$ & tau-PET difference (years) | -0.05 (0.20)                         | -0.01 (0.25)                         | 0.145   |
| MMSE                                           | 29.0 (1.39)                          | 28.1 (1.83)                          | 0.002   |
| <b>A05</b>                                     |                                      |                                      |         |
| <i>N</i>                                       | 85                                   | 45                                   |         |
| Sex                                            | 35/50                                | 25/20                                | 0.17    |
| Age                                            | 71.6 (9.89)                          | 67.6(9.02)                           | 0.03    |
| Clinical Diagnosis (CN/MCI)                    | 42 <sup>c,b</sup> /43 <sup>a</sup>   | 10 <sup>a</sup> /35                  | 0.004   |
| A $\beta$ Positivity (-/+)                     | 63 <sup>c</sup> /22                  | 21 <sup>a,d</sup> /24 <sup>c</sup>   | 0.003   |
| Education                                      | 15.4 (2.45)                          | 15.8 (2.02)                          | 0.32    |
| Mean tau-PET follow-up (years)                 | 1.45(0.193)                          | 1.37 (0.290)                         | 0.06    |
| MMSE                                           | 28.8 (1.46)                          | 28.0 (1.83)                          | 0.01    |

M male, F female, CN cognitively normal, MCI mildly cognitively impaired, MMSE Mini Mental State Examination, BL Baseline different from— a CN  $\epsilon 4-$ , b MCI  $\epsilon 4-$ , c CN  $\epsilon 4+$

different from— a A $\beta$ -  $\epsilon 4-$ , b A $\beta$ +  $\epsilon 4-$ , c A $\beta$ -  $\epsilon 4+$ , d A $\beta$ -  $\epsilon 4+$  (significance level 0.05 Bonferroni corrected)

Mean BL amyloid & tau-PET difference (years) not included for A05; all BL amyloid scans within 30 days of BL tau-PET scans.

Values are presented as mean (SD), Amyloid positivity according to threshold of 1.1 amyloid-PET SUVR.

p-values were derived from ANOVA for continuous measures and from Chi squared tests for categorical measures.

A05 mean BL A $\beta$  & tau -PET differences (year) were not assessed as initial A $\beta$  scans were carried out within 30 days of initial tau-PET scan.

12 A05 subjects did not have available education data.

**eTable 2.** Regression model ANOVA & Akaike information criterion

|                            | F    | p-value | Quadratic | AIC | Linear   |
|----------------------------|------|---------|-----------|-----|----------|
| <b>Braak Stages</b>        |      |         |           |     |          |
| ADNI                       |      |         |           |     |          |
| Braak III                  | 6.83 | 0.001   | -1270.3   |     | -1260.5  |
| Braak IV                   | 6.58 | 0.002   | -1223.2   |     | -1213.9  |
| Braak V                    | 3.43 | 0.034   | -1157.6   |     | -1154.6  |
| Braak VI                   | 1.43 | 0.242   | -1301.7   |     | -1302.74 |
| A05                        |      |         |           |     |          |
| Braak III                  | 2.58 | 0.080   | -847.1    |     | -845.7   |
| Braak IV                   | 0.86 | 0.427   | -839.3    |     | -841.5   |
| Braak V                    | 2.44 | 0.091   | -710.1    |     | -708.9   |
| Braak VI                   | 0.37 | 0.690   | -743.7    |     | -746.9   |
| <b>Connectivity Stages</b> |      |         |           |     |          |
| ADNI                       |      |         |           |     |          |
| Q1                         | 8.14 | 0.000   | -1200.7   |     | -1188.3  |
| Q2                         | 3.37 | 0.036   | -1381.1   |     | -1378.1  |
| Q3                         | 3.37 | 0.036   | -1454.4   |     | -1454.8  |
| Q4                         | 0.96 | 0.383   | -1505.5   |     | -1507.5  |
| A05                        |      |         |           |     |          |
| Q1                         | 1.95 | 0.147   | -703.8    |     | -703.7   |
| Q2                         | 3.74 | 0.027   | -719.9    |     | -716.1   |
| Q3                         | 1.49 | 0.229   | -738.5    |     | -739.3   |
| Q4                         | 0.02 | 0.981   | -819.7    |     | -823.6   |

AIC Akaike information criterion

The table displays F, and p-values derived from ANOVAs fitted quadratic and linear regression models fitted with interaction effect of ApoE4 risk and Centiloid or Centiloid<sup>2</sup> on the rate of annual tau accumulation in respective Braak stages and connectivity stages in ADNI and A05. The table also displays AICs for the respective quadratic and linear models.

**eTable 3. Mediation Results controlled for clinical diagnosis**

|           | B     | CI L  | CI U  | p-value |
|-----------|-------|-------|-------|---------|
| ADNI      |       |       |       |         |
| Global    | 0.14  | 0.03  | 0.27  | 0.006   |
| Braak I   | 0.05  | 0.17  | -0.06 | 0.38    |
| Braak III | 0.19  | 0.31  | 0.06  | <0.001  |
| Braak IV  | 0.169 | 0.29  | 0.06  | 0.002   |
| Braak V   | 0.119 | 0.24  | 0.01  | 0.04    |
| Braak VI  | 0.10  | 0.21  | -0.02 | 0.10    |
| A05       |       |       |       |         |
| Global    | 0.25  | 0.1   | 0.44  | <0.001  |
| Braak I   | -0.01 | -0.14 | 0.12  | 0.918   |
| Braak III | 0.24  | 0.09  | 0.43  | <0.001  |
| Braak IV  | 0.20  | 0.07  | 0.38  | <0.001  |
| Braak V   | 0.26  | 0.11  | 0.45  | <0.001  |
| Braak VI  | 0.21  | 0.07  | 0.39  | <0.001  |

CI L 95% Confidence interval lower, CI U 95% Confidence interval upper.

Values are ACME values derived from mediation analyses with ApoE4 risk as predictor, centiloid as mediator, and the annual tau SUVR rate of change (ROC) in the respective Braak stage as the dependent variable. The table displays beta-estimates and p-values. The mediation models are controlled for age, sex and clinical diagnosis.

**eTable 4.** Interaction effects estimated by linear regression controlled for clinical diagnosis

|                     | $\beta$ | t-value | p-value | Par. R <sup>2</sup> | Lower cut-point |       |       | Upper cut-point |       |       |
|---------------------|---------|---------|---------|---------------------|-----------------|-------|-------|-----------------|-------|-------|
|                     |         |         |         |                     | mean            | CI L  | CI U  | mean            | CI L  | CI U  |
| <b>Braak Stages</b> |         |         |         |                     |                 |       |       |                 |       |       |
| ADNI                |         |         |         |                     |                 |       |       |                 |       |       |
| Braak III           | -0.34   | -3.34   | <0.001  | 0.05                | 16.10           | 15.43 | 16.76 | 75.90           | 75.05 | 76.75 |
| Braak IV            | -0.36   | -3.45   | <0.001  | 0.05                | 12.44           | 11.74 | 13.15 | 74.20           | 73.33 | 75.06 |
| Braak V             | -0.27   | -2.58   | 0.010   | 0.03                | 12.43           | 11.43 | 13.42 | 79.80           | 78.76 | 80.84 |
| Braak VI            | -0.18   | -1.63   | 0.105   | 0.014               | –               | –     | –     | –               | –     | –     |
| A05                 |         |         |         |                     |                 |       |       |                 |       |       |
| Braak III           | -0.26   | -2.14   | 0.035   | 0.04                | 15.42           | 14.14 | 16.70 | 60.47           | 58.32 | 62.61 |
| Braak IV            | -0.15   | -1.24   | 0.219   | 0.02                | –               | –     | –     | –               | –     | –     |
| Braak V             | -0.26   | -2.19   | 0.030   | 0.04                | 11.03           | 9.89  | 12.17 | 63.96           | 61.82 | 66.0  |
| Braak VI            | -0.09   | -0.71   | 0.482   | 0.03                | –               | –     | –     | –               | –     | –     |
| Connectivity Stages |         |         |         |                     |                 |       |       |                 |       |       |
| ADNI                |         |         |         |                     |                 |       |       |                 |       |       |
| Q1                  | -0.38   | -3.72   | <0.001  | 0.06                | 11.20           | 10.61 | 11.80 | 83.60           | 82.74 | 84.45 |
| Q2                  | -0.26   | -2.56   | 0.011   | 0.03                | 13.29           | 12.39 | 14.19 | 80.77           | 79.72 | 81.83 |
| Q3                  | -0.20   | -1.86   | 0.064   | 0.02                | –               | –     | –     | –               | –     | –     |
| Q4                  | -0.13   | -1.19   | 0.234   | 0.01                | –               | –     | –     | –               | –     | –     |
| A05                 |         |         |         |                     |                 |       |       |                 |       |       |
| Q1                  | -0.23   | -1.95   | 0.053   | 0.03                | 13.31           | 12.25 | 14.37 | 69.70           | 67.67 | 71.74 |
| Q2                  | -0.31   | -2.62   | 0.010   | 0.07                | 11.93           | 10.86 | 13    | 56.48           | 54.38 | 58.57 |
| Q3                  | -0.20   | -1.65   | 0.102   | 0.04                | –               | –     | –     | –               | –     | –     |
| Q4                  | -0.02   | -0.19   | 0.846   | 0.02                | –               | –     | –     | –               | –     | –     |

CI L 95% Confidence interval lower, CI U 95% Confidence interval upper

Values derived from regressions fitted with the interaction effect of ApoE4 risk and Centiloid<sup>2</sup> on the rate of annual tau accumulation in respective Braak stages and connectivity stages in ADNI and A05. Lower and upper cut-points means and CI values estimated through selecting the point of no overlap of 95% and re-overlap of confidence intervals of bootstrapped regressions. The table displays standardized  $\beta$ -estimates, T-values, p-values and partial R squared. The regression models are controlled for age, sex and clinical diagnosis.

**eTable 5. Demographic and Clinical data for dementia subjects stratified by ApoE4 carriage**

|                                                | $\epsilon 4-$   | $\epsilon 4+$                   | p-value |
|------------------------------------------------|-----------------|---------------------------------|---------|
| ADNI                                           |                 |                                 |         |
| N                                              | 15              | 19                              |         |
| Sex (F/M)                                      | 8/7             | 5/14                            | 0.21    |
| Age                                            | 77.7 (7.70)     | 75.8 (8.17)                     | 0.485   |
| A $\beta$ Positivity (-/+)                     | 5/10            | 2/17                            | 0.228   |
| Education (Years)                              | 14.1 (2.53)     | 16.8 (2.53)                     | 0.005   |
| Mean tau-PET follow-up time (years)            | 1.76 (0.62)     | 1.49 (0.59)                     | 0.203   |
| Tau-PET BL amyloid-PET time difference (years) | -0.0493 (0.150) | -0.041 (0.075)                  | 0.839   |
| MMSE                                           | 22.2 (5.97)     | 21.8 (5.59)                     | 0.916   |
| A05                                            |                 |                                 |         |
| N                                              | 16              | 19                              |         |
| Sex                                            | 9/7             | 10/9                            | 1       |
| Age                                            | 72.9 (10.7)     | 75.5 (6.59)                     | 0.383   |
| A $\beta$ Positivity (-/+)                     | 9/7             | 2 <sup>b</sup> /17 <sup>a</sup> | 0.011   |
| MMSE                                           | 21.8 (2.86)     | 22.3 (4.37)                     | 0.661   |
| Education                                      | 15.4 (1.75)     | 15.5 (2.18)                     | 0.825   |
| Mean tau-PET follow-up time (years)            | 1.41 (0.256)    | 1.50 (0)                        | 0.119   |

M male, F female, MMSE Mini Mental State Examination, BL Baseline

Different from— a  $\epsilon 4+A\beta+$ , b  $\epsilon 4+A\beta-$  (significance level 0.05 Bonferroni corrected)

Mean BL amyloid & tau-PET difference (years) not included for A05; all BL amyloid scans within 30 days of BL tau-PET scans.

Values are presented as mean (SD). Amyloid positivity according to threshold of 1.1 amyloid-PET SUVR.

p-values were derived from ANOVA for continuous measures and from Chi squared tests for categorical measures.

A05 mean BL A $\beta$  & tau -PET differences (year) were not assessed as initial A $\beta$  scans were carried out within 30 days of initial tau-PET scan.

2 A05 subjects did not have available education data.



**eTable 6.** Interaction effects estimated by linear regression in CN, MCI & Dementia subjects

|                     | $\beta$ | t-value | p-value | Adj. p-value | Par. R <sup>2</sup> | Lower cut-point |       |       | Upper cut-point |       |       |
|---------------------|---------|---------|---------|--------------|---------------------|-----------------|-------|-------|-----------------|-------|-------|
|                     |         |         |         |              |                     | mean            | CI L  | CI U  | mean            | CI L  | CI U  |
| <b>Braak Stages</b> |         |         |         |              |                     |                 |       |       |                 |       |       |
| ADNI                |         |         |         |              |                     |                 |       |       |                 |       |       |
| Braak III           | -0.33   | -3.38   | 0.001*  | 0.002        | 0.04                | 15.40           | 14.70 | 16.09 | 76.67           | 75.69 | 77.65 |
| Braak IV            | -0.34   | -3.58   | 0.000*  | 0.002        | 0.05                | 11.67           | 11.01 | 12.32 | 80.38           | 79.61 | 81.16 |
| Braak V             | -0.29   | -3.02   | 0.003*  | 0.004        | 0.03                | 12.05           | 11.18 | 12.93 | 84.07           | 83.18 | 84.95 |
| Braak VI            | -0.29   | -2.88   | 0.004*  | 0.004        | 0.03                | 12.31           | 11.40 | 13.23 | 79.57           | 78.60 | 80.53 |
| A05                 |         |         |         |              |                     |                 |       |       |                 |       |       |
| Braak III           | -0.25   | -2.30   | 0.023*  | 0.046        | 0.05                | 10.88           | 9.93  | 11.83 | 55.80           | 54.08 | 57.52 |
| Braak IV            | -0.20   | -1.72   | 0.088   | 0.118        | 0.02                | –               | –     | –     | –               | –     | –     |
| Braak V             | -0.25   | -2.39   | 0.018*  | 0.046        | 0.05                | 7.27            | 6.54  | 8.01  | 57.12           | 55.62 | 58.61 |
| Braak VI            | -0.10   | -0.93   | 0.356   | 0.356        | 0.04                | –               | –     | –     | –               | –     | –     |
| ADNI                |         |         |         |              |                     |                 |       |       |                 |       |       |
| Q1                  | -0.38   | -3.91   | 0.000*  | 0.000        | 0.05                | 9.13            | 8.57  | 9.70  | 84.17           | 83.40 | 84.94 |
| Q2                  | -0.33   | -3.47   | 0.001*  | 0.001        | 0.04                | 9.87            | 9.24  | 10.50 | 83.39           | 82.51 | 84.27 |
| Q3                  | -0.24   | -2.43   | 0.016*  | 0.021        | 0.02                | 13.20           | 12.11 | 14.29 | 81.43           | 80.35 | 82.51 |
| Q4                  | -0.15   | -1.48   | 0.141   | 0.141        | 0.01                | –               | –     | –     | –               | –     | –     |
| A05                 |         |         |         |              |                     |                 |       |       |                 |       |       |
| Q1                  | -0.24   | -2.31   | 0.022*  | 0.045        | 0.04                | 9.70            | 9.02  | 10.37 | 60.28           | 58.80 | 61.77 |
| Q2                  | -0.30   | -2.85   | 0.005*  | 0.020        | 0.07                | 8.58            | 7.92  | 9.24  | 55.65           | 54.32 | 56.98 |
| Q3                  | -0.18   | -1.62   | 0.108   | 0.144        | 0.04                | –               | –     | –     | –               | –     | –     |
| Q4                  | -0.07   | -0.56   | 0.573   | 0.573        | 0.02                | –               | –     | –     | –               | –     | –     |

CI L 95% Confidence interval lower, CI U 95% Confidence interval upper

Values derived from regressions fitted with the interaction effect of ApoE4 risk and Centiloid<sup>2</sup> on the rate of annual tau accumulation in respective Braak stages and connectivity stages in ADNI and A05 IN CN, MCI and dementia subjects. Lower and upper cut-points means and CI values estimated through selecting the point of no overlap of 95% and re-overlap of confidence intervals of bootstrapped regressions. The table displays standardized  $\beta$ -estimates, T-values, p-values and partial R squared. The regression models are controlled for age and sex. \*p-values that fall below an FDR-corrected p-value of 0.05

**eTable 7.** Effect of Annual tau-SUVR change on MMSE change

|                    | $\beta$ | t-value | p-value | par. R <sup>2</sup> |
|--------------------|---------|---------|---------|---------------------|
|                    |         | ADNI    |         |                     |
| CN, MCI            | -0.32   | -5.2    | <0.001  | 0.10                |
| CN, MCI & Dementia | -0.3    | -5.12   | <0.001  | 0.09                |
|                    |         | A05     |         |                     |
| CN, MCI            | -0.28   | -3.24   | 0.002   | 0.08                |
| CN, MCI & Dementia | -0.39   | -5.38   | <0.001  | 0.15                |

Values derived from regressions fitted with the global rate of annual tau accumulation on the annual change in MMSE a sample of CN and MCI subject, and additionally dementia subjects. The table displays standardized  $\beta$ -estimates, T-values, p-values and partial R squared. The regression models are controlled for age and sex.

### 3. SUPPLEMENTAL FIGURES

**eFigure 1**

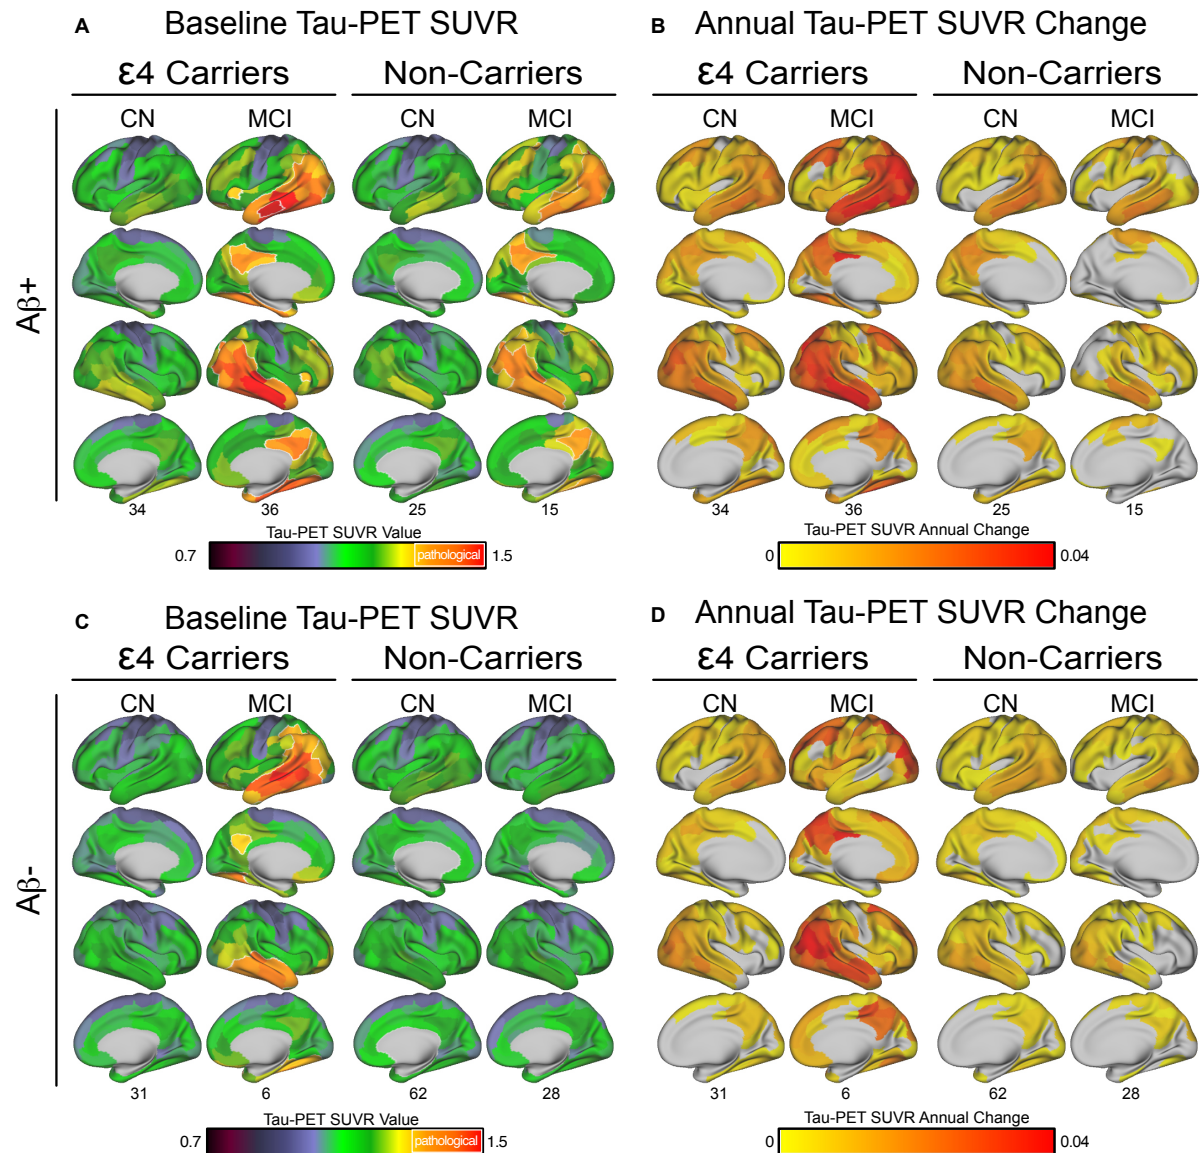

Group-average tau-PET SUVRs in ADNI at baseline stratified by ApoE4 carriership, diagnostic group and Aβ positivity. Tau-PET SUVRs are showed as continuous values, white outlines define areas which surpass a pre-established pathological tau-PET SUVR threshold of 1.373 in Aβ+ subjects (A) and Aβ- subjects (C). Number of subjects displayed under each group rendering, Group average tau-SUVR annual change rates defined by linear mixed models, stratified by ApoE4 carriership and diagnostic group in Aβ+ subjects (B) and Aβ- subjects (D).

**eFigure 2**

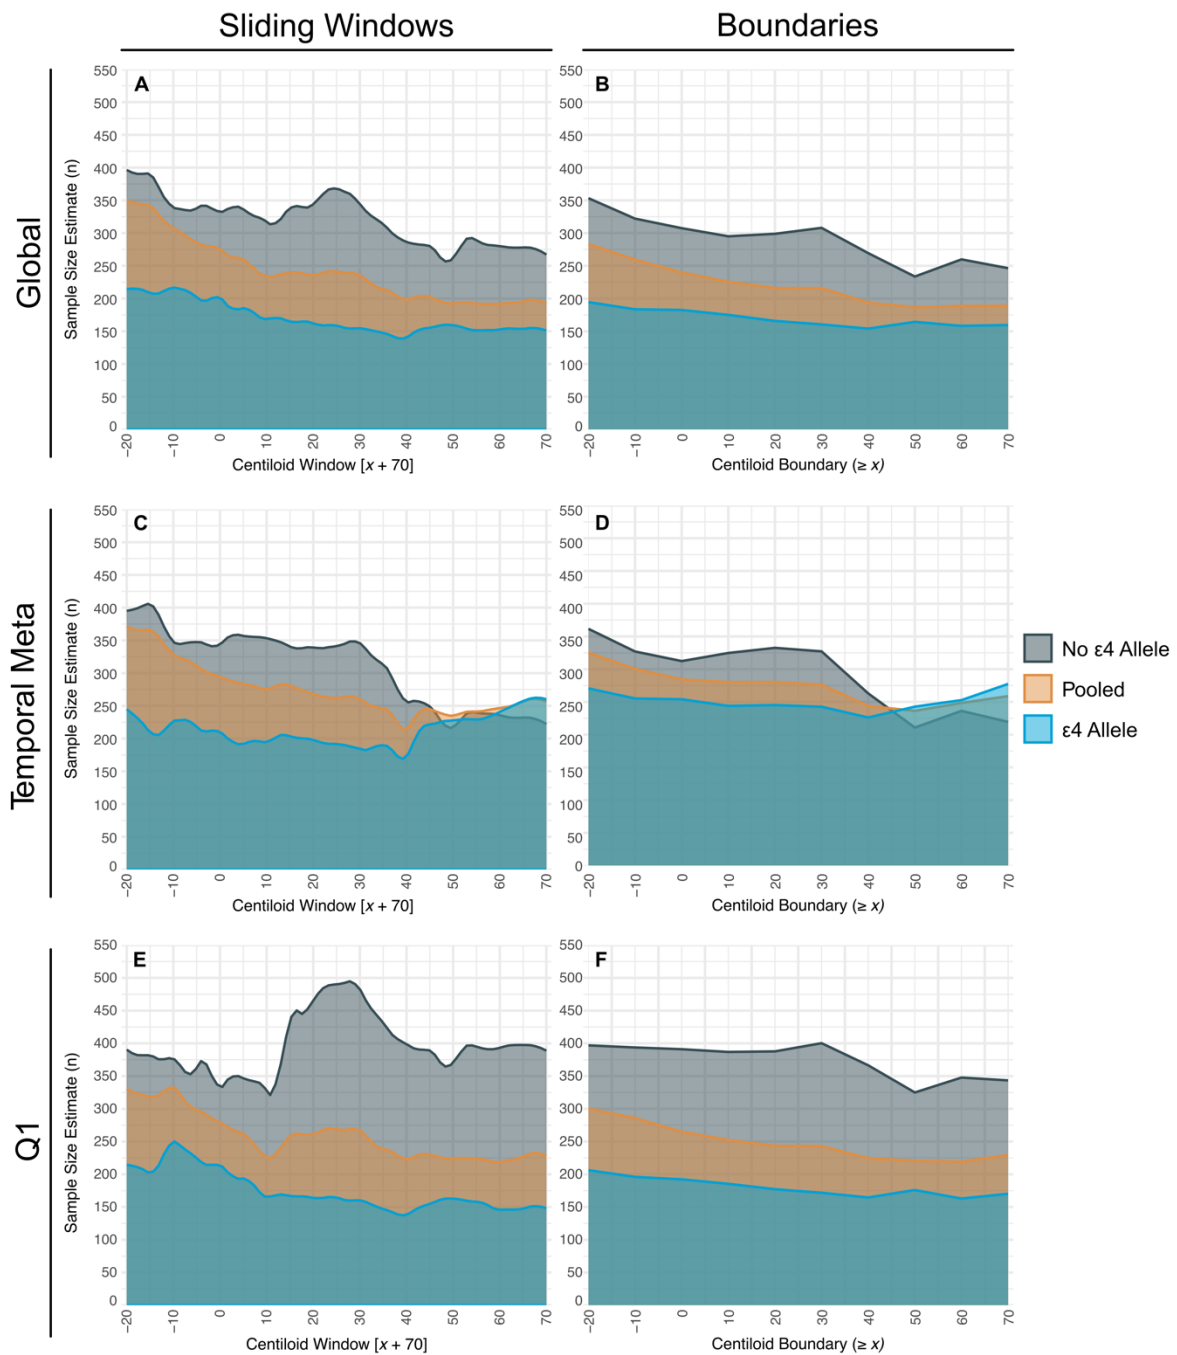

Required sample sizes to detect simulated intervention effects with tau change as an endpoint estimated through sliding windows of centiloid starting at [-20;50] moving up in steps of 1 to [100;140] estimated at 30 (A, C, E) and through centiloid boundaries capturing all subjects with a centiloid the same or higher as the boundary starting at -20 increasing in steps of 10 (B, D, F). Sample sizes were estimated according to 3 different tau-PET readout regions: Global (A, B) i.e. average across all 200 cortical Schaefer ROIs, Temporal Meta (C, D) and Q1 (E, F). Results demonstrate that non-ε4 carriers may require higher sample sizes to detect intervention effects throughout the centiloid scale, but particularly at earlier centiloid levels.

eFigure 3

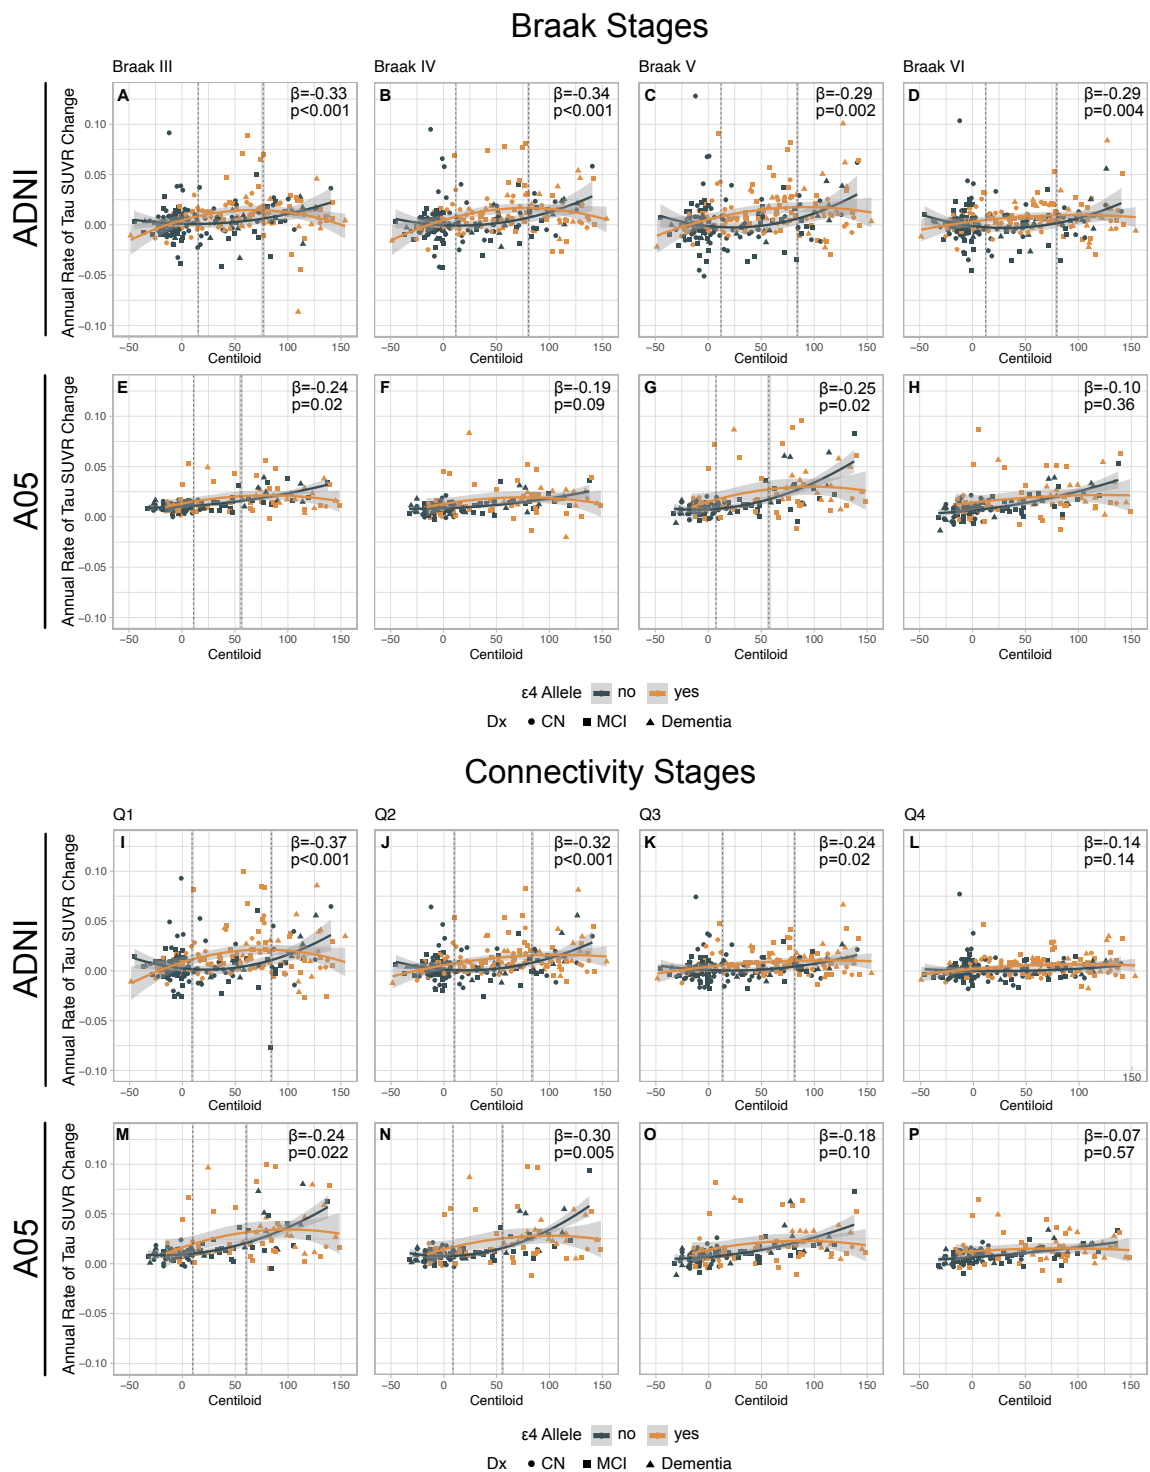

Scatterplots illustrating the interaction effect between ApoE4 status and centiloid on the annual rate of tau SUVR change in CN, MCI & Dementia subjects through braak stages III to VI in ADNI (A, B, C, D) and A05 (E, F, G, H) and through connectivity stages Q1 to Q4 in ADNI (I, J, K, L) and A05 (M, N, O, P) showing that ApoE4 carriers show an amyloid-related increase in tau accumulation in early disease stages. Vertical dashed lines represent centiloid threshold of when

*groups diverge and converge, estimated according to a non-parametric bootstrapping technique with 1000 iterations identifying the point of where confidence intervals around regression lines diverge and converge, presented with shaded 95%CI threshold.*
