# Supplementary material
Source: PubMed Central journal article supplement (PMC10628846)
Supplement: jamaneurol-e234038-s002.pdf [file jamaneurol-e234038-s002.pdf]

## Data Sharing Statement

### Data

**Data available:** Yes

**Data types:** Participant data with identifiers

**How to access data:** ADNI data are publicly available ([adni.loni.usc.edu](http://adni.loni.usc.edu)) upon registration and compliance with the data use agreement. A05 data are available from Eli Lilly upon conclusion of a data sharing agreement.

**When available:** With publication

### Supporting Documents

**Document types:** Statistical/analytic code

**How to access documents:** [Nicolai.fanzmeier@med.uni-muenchen.de](mailto:Nicolai.fanzmeier@med.uni-muenchen.de)

**When available:** With publication

### Additional Information

**Who can access the data:** anyone requesting the data

**Types of analyses:** for any purpose

**Mechanisms of data availability:** without investigator support
